# Supplementary material for: A Cohesin-Independent Role for NIPBL at Promoters Provides Insights in CdLS
Source: PubMed Central journal article supplement (PMC3923681; doi:10.1371/journal.pgen.1004153), 2014-02-13
Supplement: pgen.1004153.s001.pdf [file pgen.1004153.s001.pdf]

**A**

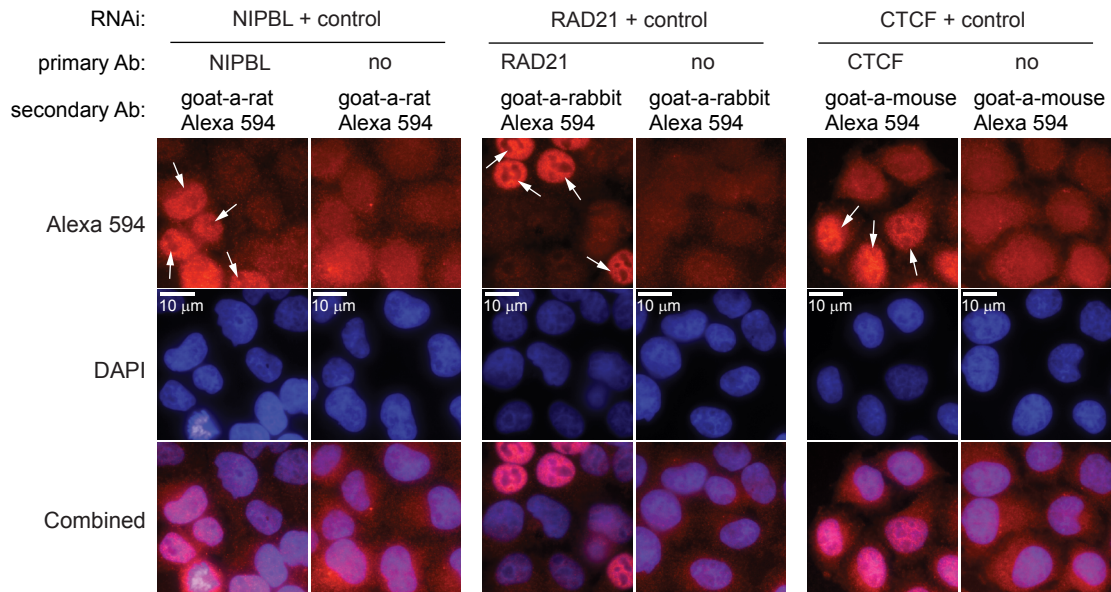

**B**

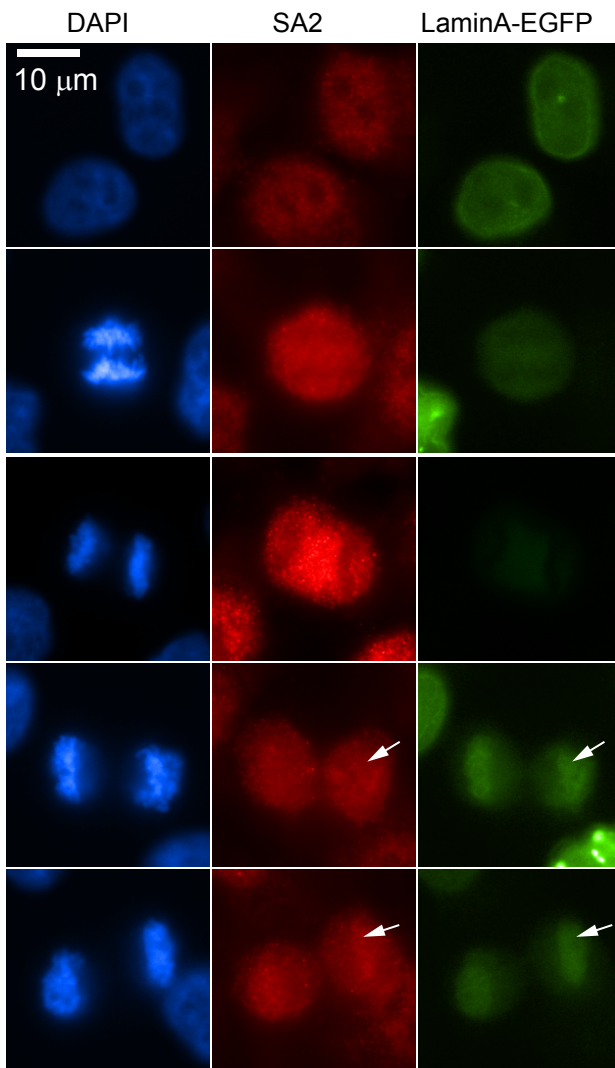

**C**

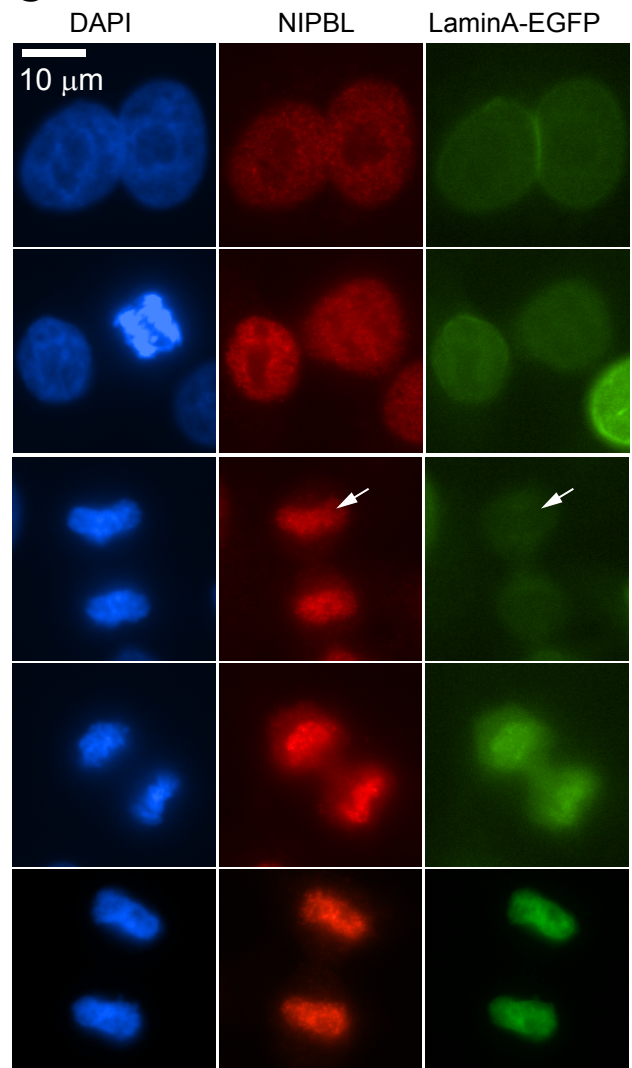

I interphase  
 A anaphase  
 LA late anaphase  
 T telophase  
 EG1 early G1 phase
