# Supplementary material for: A Cohesin-Independent Role for NIPBL at Promoters Provides Insights in CdLS
Source: PubMed Central journal article supplement (PMC3923681; doi:10.1371/journal.pgen.1004153), 2014-02-13

**A**

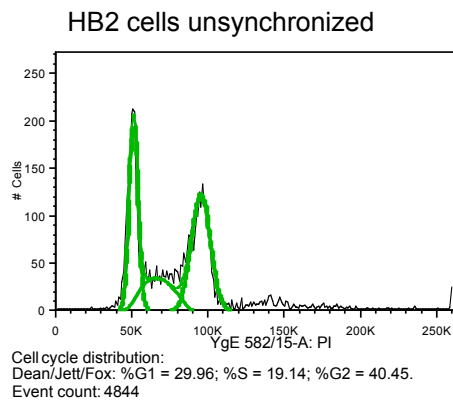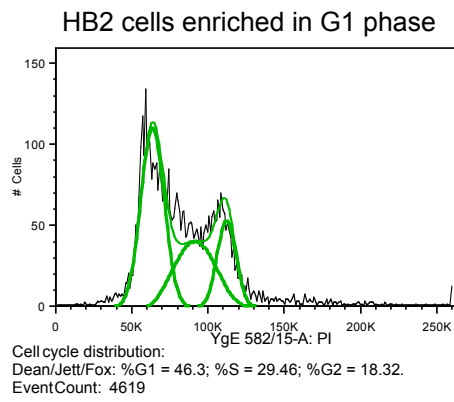

**B**

HB2 cells treated with different siRNA and enriched in G2 phase by double thymidine block

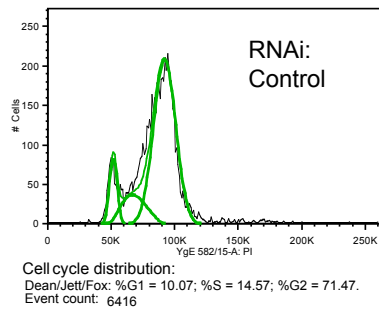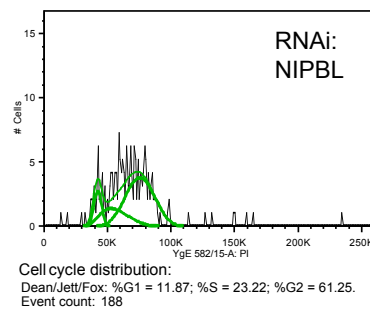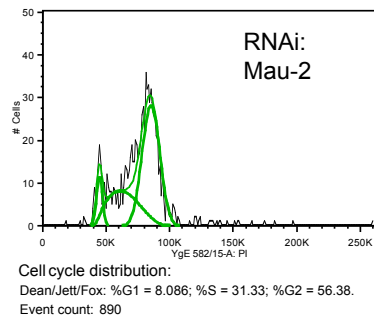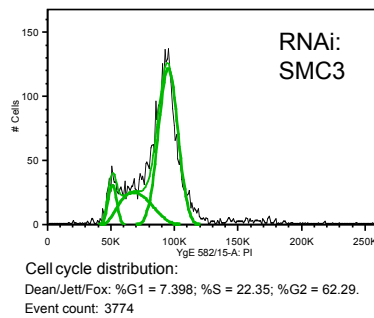

Supplement: pgen.1004153.s003.pdf [file pgen.1004153.s003.pdf]
