# Supplementary material for: A Cohesin-Independent Role for NIPBL at Promoters Provides Insights in CdLS
Source: PubMed Central journal article supplement (PMC3923681; doi:10.1371/journal.pgen.1004153), 2014-02-13

A

NIPBL-binding to repeat elements in HB2 cells

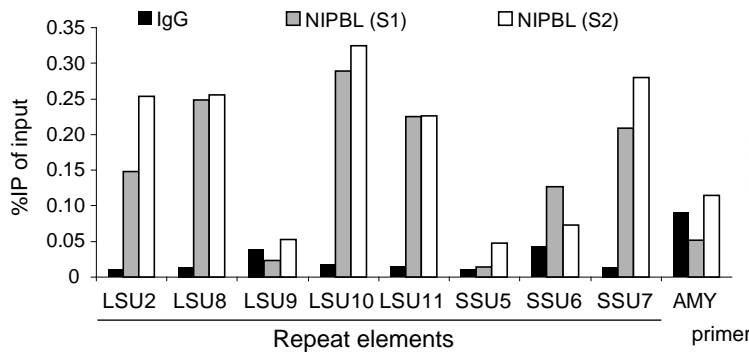

B

ChIP from mouse ES cells, Kagey et al. protocol

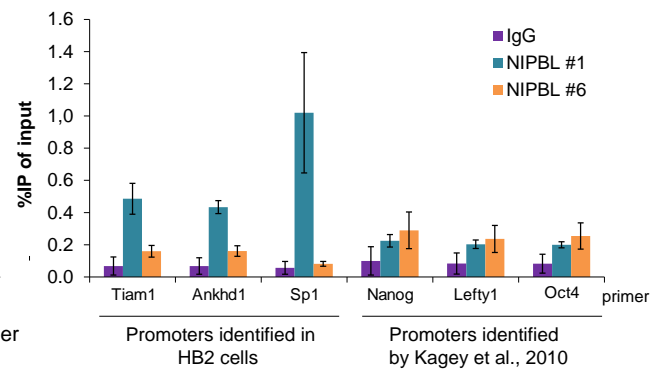

C

ChIP from mouse ES cells, Zuin et al. protocol

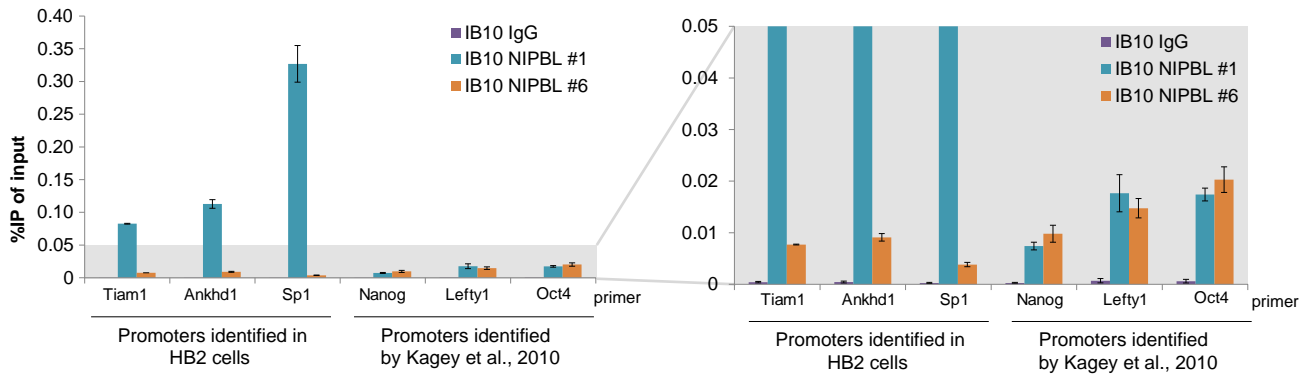

D

Immunostaining of Nipbl +/- cells with ES cell markers

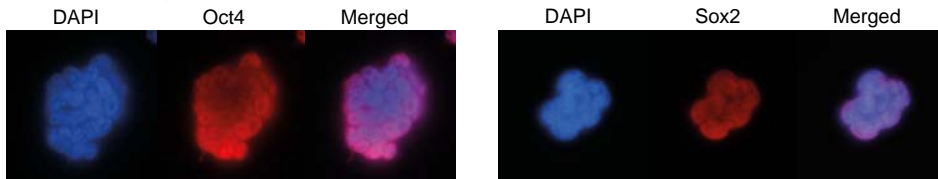

ChIP from mouse ES cells and Nipbl +/- ES cells, Zuin et al. protocol

E

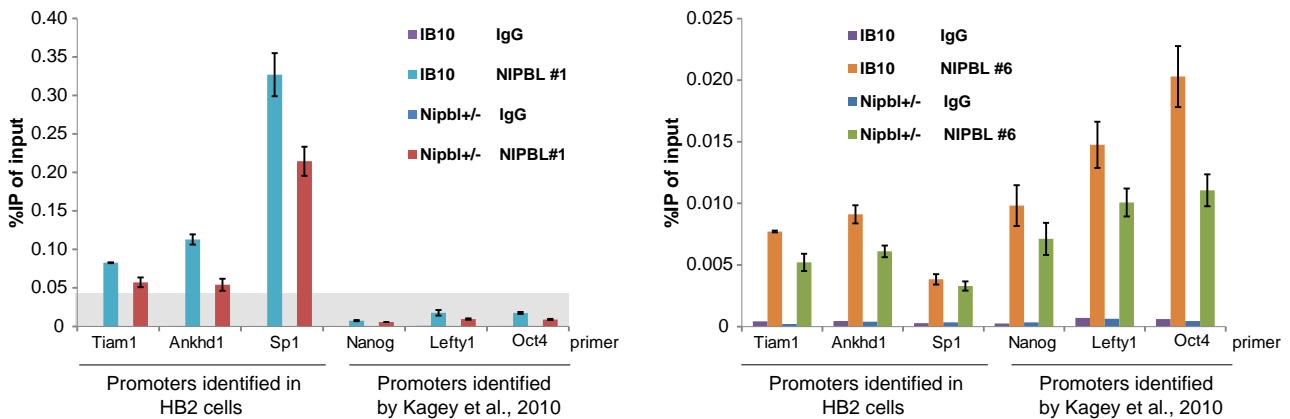

F

ChIP from human HB2 cells, Zuin et al. protocol

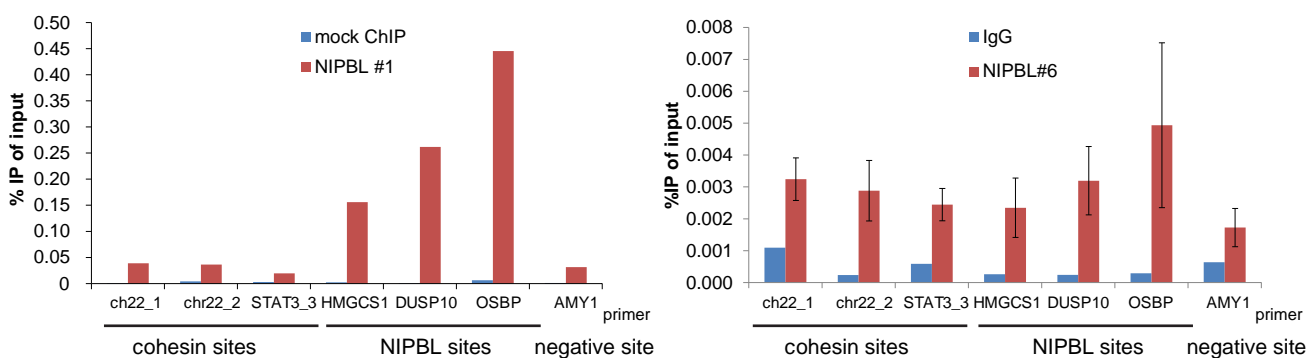

Supplement: pgen.1004153.s005.pdf [file pgen.1004153.s005.pdf]
