# Supplementary material for: A Cohesin-Independent Role for NIPBL at Promoters Provides Insights in CdLS
Source: PubMed Central journal article supplement (PMC3923681; doi:10.1371/journal.pgen.1004153), 2014-02-13

# Zuin et al., Figure S6

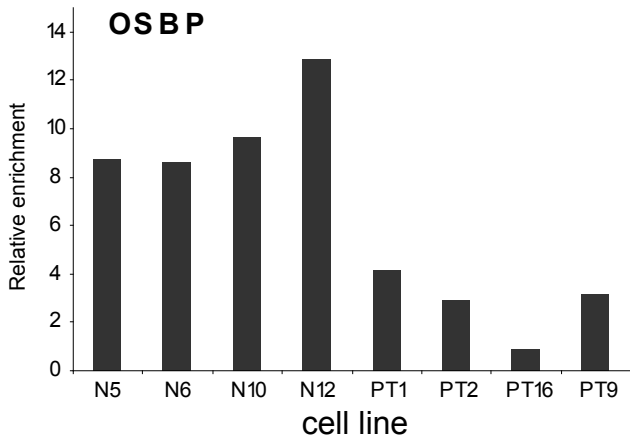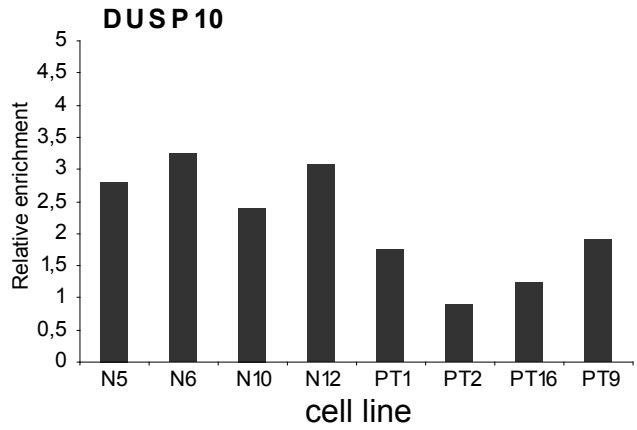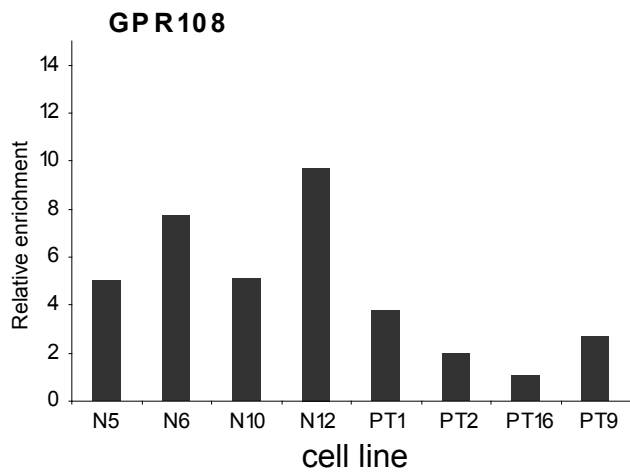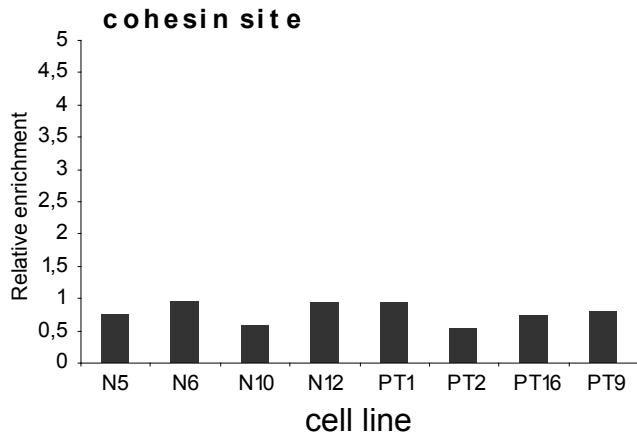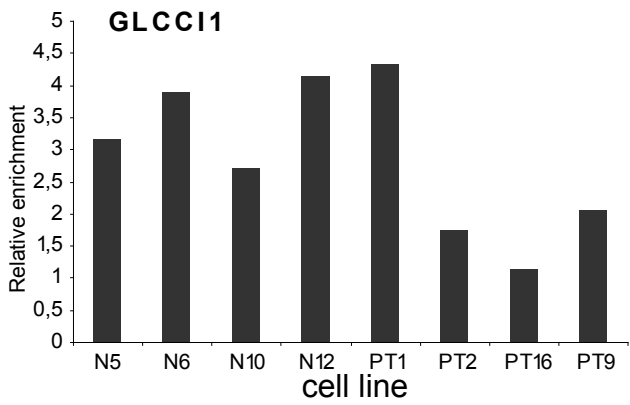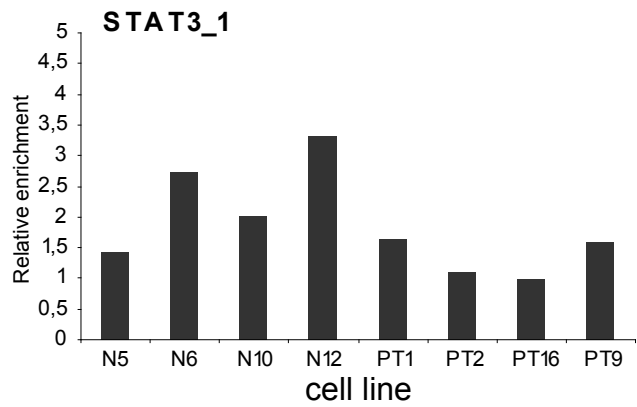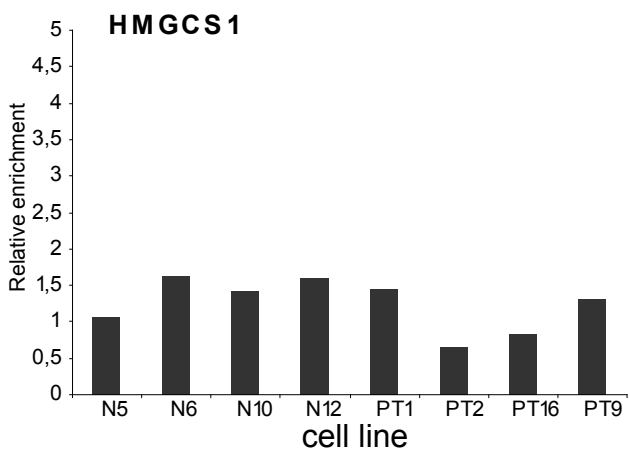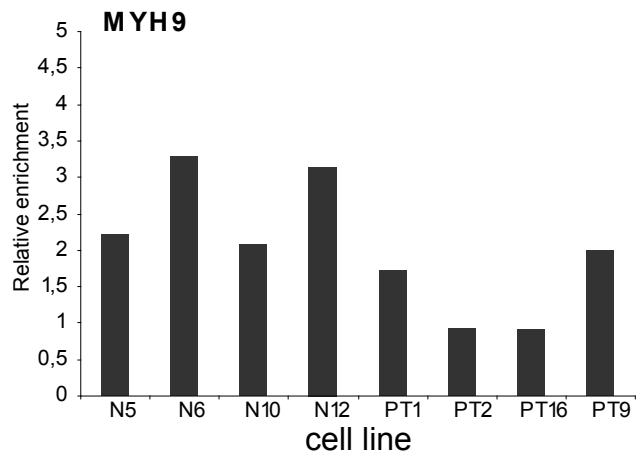

Supplement: pgen.1004153.s006.pdf [file pgen.1004153.s006.pdf]
