# Supplementary material for: A Cohesin-Independent Role for NIPBL at Promoters Provides Insights in CdLS
Source: PubMed Central journal article supplement (PMC3923681; doi:10.1371/journal.pgen.1004153), 2014-02-13
Supplement: pgen.1004153.s007.pdf [file pgen.1004153.s007.pdf]

**Zuin et al., Table S1**

***Parameters for peak calling with SWEMBL***

|                         | <b>CTCF</b> | <b>RNA Pol II</b> | <b>SMC1A</b> | <b>SMC3</b> | <b>NIPBL</b> |
|-------------------------|-------------|-------------------|--------------|-------------|--------------|
| #Sequence length        | 36          | 36                | 36           | 36          | 36           |
| #Fragment length        | 150         | 150               | 150          | 150         | 150          |
| #Background             | 0.000000    | 0.000000          | 0.000000     | 0.000000    | 0.000000     |
| #Position Background    | 0.010000    | 0.010000          | 0.010000     | 0.010000    | 0.010000     |
| #Long Background        | 0.050000    | 0.050000          | 0.050000     | 0.050000    | 0.050000     |
| #Threshold              | 5.000000    | 5.000000          | 5.000000     | 5.000000    | 5.000000     |
| #Minimum count above bg | 10          | 10                | 15           | 8           | 10           |
| #Penalty increase       | 25          | 25                | 25           | 25          | 25           |
| #Quality cutoff         | 0.000000    | 0.000000          | 0.000000     | 0.000000    | 0.000000     |
| #Result cutoff          | 4.000000    | 4.000000          | 8.000000     | 4.000000    | 4.000000     |
| #Penalty factor         | 1.000000    | 1.000000          | 1.000000     | 1.000000    | 1.000000     |
