# Supplementary material for: A Cohesin-Independent Role for NIPBL at Promoters Provides Insights in CdLS
Source: PubMed Central journal article supplement (PMC3923681; doi:10.1371/journal.pgen.1004153), 2014-02-13
Supplement: pgen.1004153.s008.pdf [file pgen.1004153.s008.pdf]

Zuin et al., Table S2

**A Peaks identified with SWEMBL in the different datasets**

|                                                        | CTCF  | SMC1A | SMC3  | RNA Pol II | NIPBL |
|--------------------------------------------------------|-------|-------|-------|------------|-------|
| Total number of peaks                                  | 35672 | 29448 | 22573 | 9897       | 1138  |
| Number of peaks associated with genes*                 | 21743 | 16501 | 13657 | 9148       | 1016  |
| % of peaks associated with genes                       | 61    | 56    | 61    | 92         | 89    |
| Number of peaks associated with <b>Expressed</b> genes | 14501 | 10775 | 9801  | 8802       | 953   |
| % of peaks associated with <b>Expressed</b> genes      | 41    | 37    | 43    | 89         | 84    |

\* as peaks were counted as associated with genes when they matched to one of the following groups:

upstream: -5000 to -1000 bp from transcription start site

promoter: -1000 to +1000 bp around transcription start site

gene body: +1000 bp from transcription start site until end of the coding sequence

downstream: end of the coding sequence + 5000 bp

**B Overlap statistics (%)**

| Total number of sites |       | Percent overlap in a window of +/- 100 bp: |       |      |       |            |
|-----------------------|-------|--------------------------------------------|-------|------|-------|------------|
|                       |       | CTCF                                       | SMC1A | SMC3 | NIPBL | SMC1A+SMC3 |
| CTCF                  | 35672 |                                            | 51.4  | 38.3 | 0.3   | 59.3       |
| SMC1A                 | 29448 | 62.3                                       |       | 39.2 | 0.2   | 100.0      |
| SMC3                  | 22573 | 60.5                                       | 51.1  |      | 0.4   | 100.0      |
| NIPBL                 | 1138  | 9.8                                        | 4.3   | 8.4  |       | 10.4       |
| SMC1+SMC3             | 40465 | 52.3                                       | 72.8  | 55.8 | 0.3   |            |
