# Supplementary material for: A Cohesin-Independent Role for NIPBL at Promoters Provides Insights in CdLS
Source: PubMed Central journal article supplement (PMC3923681; doi:10.1371/journal.pgen.1004153), 2014-02-13
Supplement: pgen.1004153.s009.pdf [file pgen.1004153.s009.pdf]

## Zuin et al., Table S3

### Position of binding sites relative to genes

Around each gene four regions were designed:

upstream: -5000 to -1000 bp from transcription start site

promoter: -1000 to +1000 bp around transcription start site

gene body: +1000 bp from transcription start site until end of the coding sequence

downstream: end of the coding sequence + 5000 bp

Binding sites of NIPBL, CTCF, SMC1A, SMC3 and RNA Pol II were sorted in these categories. The respective genes were scored for their activity calculating RPKM (reads mapping to the genome per kilobase of transcript per million reads sequenced) Genes with RPKM values >0.6 were scored as expressed.

|                     |     | NIPBL                    |                            |           |            |
|---------------------|-----|--------------------------|----------------------------|-----------|------------|
|                     |     | Position around the gene |                            |           |            |
|                     |     | upstream                 | promoter                   | gene body | downstream |
| Expression          | no  | 3                        | 6                          | 1         | 2          |
|                     | yes | 24                       | 906                        | 48        | 26         |
| <b>Total sites:</b> |     | 1138                     | <b>Sites around genes:</b> |           | 1016       |

  

|                     |     | CTCF                     |                            |           |            |
|---------------------|-----|--------------------------|----------------------------|-----------|------------|
|                     |     | Position around the gene |                            |           |            |
|                     |     | upstream                 | promoter                   | gene body | downstream |
| Expression          | no  | 415                      | 333                        | 1169      | 420        |
|                     | yes | 1589                     | 4405                       | 11861     | 1551       |
| <b>Total sites:</b> |     | 35668                    | <b>Sites around genes:</b> |           | 21743      |

  

|                     |     | SMC1A                    |                            |           |            |
|---------------------|-----|--------------------------|----------------------------|-----------|------------|
|                     |     | Position around the gene |                            |           |            |
|                     |     | upstream                 | promoter                   | gene body | downstream |
| Expression          | no  | 301                      | 227                        | 835       | 328        |
|                     | yes | 1200                     | 2761                       | 9545      | 1304       |
| <b>Total sites:</b> |     | 29441                    | <b>Sites around genes:</b> |           | 16501      |

  

|                     |     | SMC3                     |                            |           |            |
|---------------------|-----|--------------------------|----------------------------|-----------|------------|
|                     |     | Position around the gene |                            |           |            |
|                     |     | upstream                 | promoter                   | gene body | downstream |
| Expression          | no  | 214                      | 152                        | 448       | 221        |
|                     | yes | 1094                     | 2686                       | 7727      | 1115       |
| <b>Total sites:</b> |     | 22572                    | <b>Sites around genes:</b> |           | 13657      |

  

|                     |     | RNA Pol II               |                            |           |            |
|---------------------|-----|--------------------------|----------------------------|-----------|------------|
|                     |     | Position around the gene |                            |           |            |
|                     |     | upstream                 | promoter                   | gene body | downstream |
| Expression          | no  | 18                       | 40                         | 7         | 6          |
|                     | yes | 319                      | 7150                       | 1205      | 403        |
| <b>Total sites:</b> |     | 9879                     | <b>Sites around genes:</b> |           | 9148       |
