# Supplementary material for: A Cohesin-Independent Role for NIPBL at Promoters Provides Insights in CdLS
Source: PubMed Central journal article supplement (PMC3923681; doi:10.1371/journal.pgen.1004153), 2014-02-13
Supplement: pgen.1004153.s010.pdf [file pgen.1004153.s010.pdf]

## Zuin et al., Table S4

Classification of promoters and expression status of genes bound by NIPBL<sup>1</sup>, cohesin (SMC1A and SMC3), RNA Pol II and CTCF

(<sup>1</sup> the identical definition of the NIPBL-gene association as in Table S3)

| NIPBL                  |     |      |                            |        |
|------------------------|-----|------|----------------------------|--------|
| CpG island in promoter |     |      |                            |        |
|                        |     | no   | yes                        | Total: |
| Expression             | no  | 27   | 36                         | 63     |
|                        | yes | 85   | 868                        | 953    |
| <b>Total sites:</b>    |     | 1138 | <b>Sites around genes:</b> | 1016   |

  

| SMC1A                  |     |       |                            |        |
|------------------------|-----|-------|----------------------------|--------|
| CpG island in promoter |     |       |                            |        |
|                        |     | no    | yes                        | Total: |
| Expression             | no  | 3102  | 2624                       | 5726   |
|                        | yes | 1816  | 8959                       | 10775  |
| <b>Total sites:</b>    |     | 29441 | <b>Sites around genes:</b> | 16501  |

  

| SMC3                   |     |       |                            |        |
|------------------------|-----|-------|----------------------------|--------|
| CpG island in promoter |     |       |                            |        |
|                        |     | no    | yes                        | Total: |
| Expression             | no  | 2132  | 1724                       | 3856   |
|                        | yes | 1578  | 8223                       | 9801   |
| <b>Total sites:</b>    |     | 22572 | <b>Sites around genes:</b> | 13657  |

  

| RNA Pol II             |     |      |                            |        |
|------------------------|-----|------|----------------------------|--------|
| CpG island in promoter |     |      |                            |        |
|                        |     | no   | yes                        | Total: |
| Expression             | no  | 149  | 197                        | 346    |
|                        | yes | 710  | 8092                       | 8802   |
| <b>Total sites:</b>    |     | 9879 | <b>Sites around genes:</b> | 9148   |

  

| CTCF                   |     |       |                            |        |
|------------------------|-----|-------|----------------------------|--------|
| CpG island in promoter |     |       |                            |        |
|                        |     | no    | yes                        | Total: |
| Expression             | no  | 3894  | 3348                       | 7242   |
|                        | yes | 2234  | 12267                      | 14501  |
| <b>Total sites:</b>    |     | 35668 | <b>Sites around genes:</b> | 21743  |
