# Supplementary material for: A Cohesin-Independent Role for NIPBL at Promoters Provides Insights in CdLS
Source: PubMed Central journal article supplement (PMC3923681; doi:10.1371/journal.pgen.1004153), 2014-02-13
Supplement: pgen.1004153.s011.pdf [file pgen.1004153.s011.pdf]

Zuin et al., Table S5

*Molecular function of genes with NIPBL binding sites in HB2 cells identified by IPA analysis (IPA version 9.0, IGENUITY SYSTEMS)*

| <b>Category</b>                                       | <b>Genes</b> | <b>p-value</b>    |
|-------------------------------------------------------|--------------|-------------------|
| <i>Cell Cycle</i>                                     | 105          | 2,17E-08-3,56E-02 |
| <i>Gene Expression</i>                                | 147          | 4,83E-08-3,59E-02 |
| <i>Organismal Development</i>                         | 84           | 1,68E-07-3,64E-02 |
| <i>RNA Post-Transcriptional Modification</i>          | 30           | 7,3E-07-1,43E-02  |
| <i>Cell Death</i>                                     | 165          | 1,6E-06-3,66E-02  |
| <i>Cellular Growth and Proliferation</i>              | 108          | 3,14E-05-2,9E-02  |
| <i>Infectious Disease</i>                             | 62           | 3,42E-05-2,9E-02  |
| <i>Embryonic Development</i>                          | 54           | 6,9E-05-3,46E-02  |
| <i>Cardiovascular System Development and Function</i> | 18           | 6,93E-05-3,35E-02 |
| <i>Cancer</i>                                         | 220          | 7,32E-05-3,74E-02 |
| <i>Developmental Disorder</i>                         | 39           | 1,09E-04-3,79E-02 |
| <i>Hematological System Development and Function</i>  | 9            | 1,3E-04-1,63E-02  |
| <i>Hematopoiesis</i>                                  | 13           | 1,3E-04-2,07E-02  |
| <i>Renal and Urological Disease</i>                   | 33           | 1,55E-04-3,74E-02 |
| <i>Dermatological Diseases and Conditions</i>         | 27           | 1,96E-04-3,79E-02 |
