# Supplementary material for: A Cohesin-Independent Role for NIPBL at Promoters Provides Insights in CdLS
Source: PubMed Central journal article supplement (PMC3923681; doi:10.1371/journal.pgen.1004153), 2014-02-13
Supplement: pgen.1004153.s012.pdf [file pgen.1004153.s012.pdf]

Zuin et al., Table S6

Primers used for ChIP/qPCR and RT-PCR/qPCR

ChIP/qPCR primer

| Name                         | forward                   | reverse                    | Position (hg18)             |
|------------------------------|---------------------------|----------------------------|-----------------------------|
| <b>cohesin binding sites</b> |                           |                            |                             |
| chr22_11                     | GGCTCAGGACAGAAGTGACC      | AGGTCGGCAGAGGCTCC          | chr22:31255080-31255266     |
| chr22_12                     | ACATGTGGCCAGCTCAGG        | GGCGCTATAAGCCAGAGAAC       | chr22:31522929-31523153     |
| STAT3_3                      | CCTCCCTTACCGCTGATGTC      | CTAAGCCTCCAGGCACCTTC       | chr17:37728538-37728637     |
| KCNQ1_1                      | AGGACCCGCATGAGGGATTC      | CCGCATATCCCTGGTTCAGC       | chr11:2510878-2511089       |
| KCNQ1_2                      | AAAGGTGTTTGCAGCCCTTG      | AACATCGTGCTCTCGGAATC       | chr11:2510713-2510912       |
| <b>NIPBL binding sites</b>   |                           |                            |                             |
| OSBP                         | GCTGCTGTTTCCGCCATTCATTTCC | GCTGATACCAACCACCAATCCATGAG | chr11:59140122-59140236     |
| HMGCS1                       | AATGACGGAGCTGCGAGATAC     | TTGCTAGGCAACCTGACAGAC      | chr5:43349567-43349749      |
| DUSP10                       | TCGGCTTATTGATCTCCAG       | AGAGCAGCTTCGGATAAACC       | chr1:219982022-219982252    |
| STAT3_1                      | CCTCCCTTACCGCTGATGTC      | CTAAGCCTCCAGGCACCTTC       | chr17:37728538-37728637     |
| GPR108                       | GGAGAGCCGATAACGCTTAAC     | GCCGGATATCAGATCCATGAC      | chr19:6688766-6688880       |
| GLCCI1                       | CACCTACCTCAAGGCTGTCAAC    | GCGAGCATTTCATTGGCTTAG      | chr7:7974693-7974884        |
| MYH9                         | GCAGACGTATTGGCCTGTGG      | GCCGCCTCCTGATTGGATTC       | chr22:35114119-35114326     |
| STAT3_1                      | CCGGAACCGCTGAATTAC        | TAGCTGCTCTCCTCATTGG        | chr17:37794031-37794204     |
| ARTS1                        | TAGCGTTGCGAGGGTTAGG       | GCACTTTGCCACGACAGAG        | chr5:96169763-96169976      |
| ZNF695                       | TCTGGCTGCACGCCTGATTG      | GGTCAAGTGCCGTGAGGAATG      | chr1:245238016-245238199    |
| TSPAN31                      | ATGCGGGTTGATTGGCATGCAG    | AGGCCAGCCAAACCAATACTC      | chr12:56424994-56425106     |
| LMBR1L                       | CTCTCCAGGAGCCAATGAGTTC    | CGCGCTCACGTTTCAATG         | chr12:47,790,854-47,790,999 |
| <b>control</b>               |                           |                            |                             |
| AMY                          | TCTGCTGGGCTCAGTATTCCTC    | TGTTGCCAAGCTTACG TAG       | chr1:104000510-104000730    |
| <b>Repeats</b>               |                           |                            |                             |
| LSU_2                        | CAGGTGCAGATGTTGGTGGTAG    | GAACCGGACTCCCTTTTCGATTG    | chr1:107914874-107915060    |
| LSU_8                        | GCCGCCACAAGCCAGTTATC      | AACCTCCCGTGGAGCAGAAG       | chr1:91625487-91625643      |
| LSU_9                        | ACTCAGGATTGGCGTCTTCCG     | AGCAGTTGAACACGGGTCAG       | chr2:229753693-229753871    |
| LSU_10                       | TGCGGTAACGTGACCGATCC      | TTTCAAGGGCCAGCGAGAGC       | chr5:71182503-71182673      |
| LSU_11                       | GCTCAACAGGGTCTTCTTTCC     | AGCCAAATGCCTCGTCATC        | chr8:70764913-70765053      |
| SSU_5                        | GCTGGATAGCTGGATAGCTGTC    | GAAGGGCAACTGCTTGG AATG     | chr15:86163096-86163239     |
| SSU_6                        | GCCGGACTTATCAAGGCAAAC     | ACAGGTCTGTGACGCTCATAG      | chr5:174474329-174474548    |
| SSU_7                        | GTAGGGCAAGTCTGGTGCCAAC    | CTGCTCCCGAGATCCAAC TACG    | chr7:80800911-80801011      |

RT-PCR/qPCR primer

| Name  | forward                     | reverse                   | Gene    |
|-------|-----------------------------|---------------------------|---------|
| TC27  | CATGGTGCAGAGCACTGAAG        | GGTACTATGCAGGATGATGG      | ARTS1   |
| TC25  | AGCGGAGTTTGTATAGGG          | GTTTGGCTGTCTTCTCTG        | ZNF695  |
| TC30  | AGGCGAACCTCCTCTTTGG         | GACGCAGAACGCTGATGTG       | GLCCI1  |
| TC31  | TGTCCAGCATCCACATCATC        | TAGCCAGACATGAGCAAGAG      | TSPAN31 |
| TC34  | GGAATCCTGCTGCATCAC          | TCGTCTCCTCTTCTTCC         | BBX     |
| TC41  | AAGCAGTGGCTGGTATGAAG        | TGAACACAAAGCGCTAGAGG      | NIPBL   |
| TC48  | CACCTGAGCCCAGGAGATTG        | TGCCTTCTGCGACCTTG         | MAU2    |
| TC35  | ACTGGCTACTGCGTACATCC        | AGATGCGCCTATCTCTTCC       | NADH    |
| TC143 | CCAGCAGCGACTCTGAGGAGGAACAAG | GTTTGTGTGGCTCCAGCAGAAGGTG | MYC     |
