# Supplementary material for: A Cohesin-Independent Role for NIPBL at Promoters Provides Insights in CdLS
Source: PubMed Central journal article supplement (PMC3923681; doi:10.1371/journal.pgen.1004153), 2014-02-13
Supplement: pgen.1004153.s013.pdf [file pgen.1004153.s013.pdf]

**Zuin et al., Table S7**

**Genes with NIPBL binding sites in LCL's (PT1) found to be differentially expressed in CdLs patient cells by Liu et al. [18] with FDR < 0.05**

| ID       | Entrez Gene Name                                            | Location        | Type(s)                 |
|----------|-------------------------------------------------------------|-----------------|-------------------------|
| ABHD2    | abhydrolase domain containing 2                             | unknown         | enzyme                  |
| AKAP13   | A kinase (PRKA) anchor protein 13                           | Cytoplasm       | other                   |
| ANKRD11  | ankyrin repeat domain 11                                    | Nucleus         | other                   |
| ARRB2    | arrestin, beta 2                                            | Cytoplasm       | other                   |
| ATP6V1E1 | ATPase, H+ transporting, lysosomal 31kDa, V1 subunit E1     | Cytoplasm       | transporter             |
| ATPIF1   | ATPase inhibitory factor 1                                  | Cytoplasm       | other                   |
| BBX      | bobby sox homolog (Drosophila)                              | Nucleus         | other                   |
| BUB3     | budding uninhibited by benzimidazoles 3 homolog (yeast)     | Nucleus         | other                   |
| CAT      | catalase                                                    | Cytoplasm       | enzyme                  |
| CDKN3    | cyclin-dependent kinase inhibitor 3                         | Nucleus         | phosphatase             |
| CDR2     | cerebellar degeneration-related protein 2, 62kDa            | Cytoplasm       | other                   |
| CHAF1A   | chromatin assembly factor 1, subunit A (p150)               | Nucleus         | other                   |
| COPZ1    | coatamer protein complex, subunit zeta 1                    | Cytoplasm       | transporter             |
| COTL1    | coactosin-like 1 (Dictyostelium)                            | Cytoplasm       | other                   |
| CREB3L2  | cAMP responsive element binding protein 3-like 2            | Nucleus         | other                   |
| CS       | citrate synthase                                            | Cytoplasm       | enzyme                  |
| DCTN4    | dynactin 4 (p62)                                            | Nucleus         | other                   |
| DDIT3    | DNA-damage-inducible transcript 3                           | Nucleus         | transcription regulator |
| DYNLRB1  | dynein, light chain, roadblock-type 1                       | Cytoplasm       | other                   |
| EBP      | emopamil binding protein (sterol isomerase)                 | Cytoplasm       | enzyme                  |
| EIF1     | eukaryotic translation initiation factor 1                  | Cytoplasm       | translation regulator   |
| ELMO2    | engulfment and cell motility 2                              | Cytoplasm       | other                   |
| EXOC4    | exocyst complex component 4                                 | Cytoplasm       | transporter             |
| F11R     | F11 receptor                                                | Plasma Membrane | other                   |
| FBXO8    | F-box protein 8                                             | Cytoplasm       | other                   |
| GLCCI1   | glucocorticoid induced transcript 1                         | Cytoplasm       | other                   |
| GLS      | glutaminase                                                 | Cytoplasm       | enzyme                  |
| GOLGB1   | golgin B1                                                   | Cytoplasm       | other                   |
| GTPBP3   | GTP binding protein 3 (mitochondrial)                       | Cytoplasm       | enzyme                  |
| HMGCS1   | 3-hydroxy-3-methylglutaryl-CoA synthase 1 (soluble)         | Cytoplasm       | enzyme                  |
| INTS3    | integrator complex subunit 3                                | Nucleus         | other                   |
| ITFG2    | integrin alpha FG-GAP repeat containing 2                   | unknown         | other                   |
| JMJD2B   | lysine (K)-specific demethylase 4B                          | unknown         | other                   |
| KHSRP    | KH-type splicing regulatory protein                         | Nucleus         | enzyme                  |
| LAPTM4A  | lysosomal protein transmembrane 4 alpha                     | Cytoplasm       | other                   |
| LAS1L    | LAS1-like (S. cerevisiae)                                   | Nucleus         | other                   |
| LRRC28   | leucine rich repeat containing 28                           | unknown         | other                   |
| MCM3     | minichromosome maintenance complex component 3              | Nucleus         | enzyme                  |
| MCM5     | minichromosome maintenance complex component 5              | Nucleus         | enzyme                  |
| MSH2     | mutS homolog 2, colon cancer, nonpolyposis type 1 (E. coli) | Nucleus         | enzyme                  |
| MTMR4    | myotubularin related protein 4                              | Cytoplasm       | phosphatase             |
| NBR1     | neighbor of BRCA1 gene 1                                    | Cytoplasm       | other                   |
| NCAPD3   | non-SMC condensin II complex, subunit D3                    | Nucleus         | other                   |
| NFE2L1   | nuclear factor (erythroid-derived 2)-like 1                 | Nucleus         | transcription regulator |
| NGRN     | neugrin, neurite outgrowth associated                       | Nucleus         | other                   |

Zuin et al., Table S7 continued

| ID       | Entrez Gene Name                                                          | Location        | Type(s)                           |
|----------|---------------------------------------------------------------------------|-----------------|-----------------------------------|
| NR2C2    | nuclear receptor subfamily 2, group C, member 2                           | Nucleus         | ligand-dependent nuclear receptor |
| NUP98    | nucleoporin 98kDa                                                         | Nucleus         | transporter                       |
| ORC2L    | origin recognition complex, subunit 2                                     | Nucleus         | other                             |
| OSBPL3   | oxysterol binding protein-like 3                                          | Cytoplasm       | other                             |
| PBXIP1   | pre-B-cell leukemia homeobox interacting protein 1                        | Nucleus         | transcription regulator           |
| PCCB     | propionyl CoA carboxylase, beta polypeptide                               | Cytoplasm       | enzyme                            |
| PHPT1    | phosphohistidine phosphatase 1                                            | Cytoplasm       | phosphatase                       |
| PIAS3    | protein inhibitor of activated STAT, 3                                    | Nucleus         | transcription regulator           |
| PJA2     | praja ring finger 2                                                       | Cytoplasm       | enzyme                            |
| PLCG1    | phospholipase C, gamma 1                                                  | Cytoplasm       | enzyme                            |
| PNN      | pinin, desmosome associated protein                                       | Plasma Membrane | other                             |
| PPP3CA   | protein phosphatase 3, catalytic subunit, alpha isozyme                   | Cytoplasm       | phosphatase                       |
| PTMA     | prothymosin, alpha                                                        | Nucleus         | other                             |
| RAB5B    | RAB5B, member RAS oncogene family                                         | Cytoplasm       | enzyme                            |
| RFWD3    | ring finger and WD repeat domain 3                                        | Nucleus         | enzyme                            |
| RPL17    | ribosomal protein L17                                                     | Cytoplasm       | other                             |
| RPS6     | ribosomal protein S6                                                      | Cytoplasm       | other                             |
| RUVBL1   | RuvB-like 1 (E. coli)                                                     | Nucleus         | transcription regulator           |
| SEC61G   | Sec61 gamma subunit                                                       | Cytoplasm       | transporter                       |
| SFXN5    | sideroflexin 5                                                            | Cytoplasm       | transporter                       |
| SLC25A37 | solute carrier family 25, member 37                                       | Cytoplasm       | transporter                       |
| SLC25A42 | solute carrier family 25, member 42                                       | Cytoplasm       | other                             |
| SLC39A3  | solute carrier family 39 (zinc transporter), member 3                     | Plasma Membrane | transporter                       |
| SNRPA    | small nuclear ribonucleoprotein polypeptide A                             | Nucleus         | other                             |
| SORT1    | sortilin 1                                                                | Cytoplasm       | transporter                       |
| STAT3    | signal transducer and activator of transcription 3 (acute-phase response) | Nucleus         | transcription regulator           |
| STT3B    | STT3, subunit of the oligosaccharyltransferase complex, homolog B (mouse) | Cytoplasm       | enzyme                            |
| TMEM9    | transmembrane protein 9                                                   | Cytoplasm       | other                             |
| TSPAN31  | tetraspanin 31                                                            | Plasma Membrane | other                             |
| UBR1     | ubiquitin protein ligase E3 component n-recogin 1                         | Cytoplasm       | enzyme                            |
| UGP2     | UDP-glucose pyrophosphorylase 2                                           | Cytoplasm       | enzyme                            |
| UTP6     | UTP6, small subunit (SSU) processome component, homolog (yeast)           | Nucleus         | other                             |
| WDR74    | WD repeat domain 74                                                       | Nucleus         | other                             |
| YBX1     | Y box binding protein 1                                                   | Nucleus         | transcription regulator           |
| ZFP91    | zinc finger protein 91 homolog (mouse)                                    | Nucleus         | transcription regulator           |
| ZNF141   | zinc finger protein 141                                                   | Nucleus         | transcription regulator           |
| ZNF211   | zinc finger protein 211                                                   | Nucleus         | transcription regulator           |
| ZNF671   | zinc finger protein 671                                                   | Nucleus         | other                             |
| ZNF691   | zinc finger protein 691                                                   | Nucleus         | other                             |
| ZNF695   | zinc finger protein 695                                                   | Nucleus         | other                             |
| ZNF720   | zinc finger protein 720                                                   | unknown         | other                             |
| ZNF91    | zinc finger protein 91                                                    | Nucleus         | transcription regulator           |
