# Supplementary material for: A Cohesin-Independent Role for NIPBL at Promoters Provides Insights in CdLS
Source: PubMed Central journal article supplement (PMC3923681; doi:10.1371/journal.pgen.1004153), 2014-02-13
Supplement: pgen.1004153.s014.pdf [file pgen.1004153.s014.pdf]

Zuin et al., Table S 8

***NIPBL ChIP signals in HB2 cells on different repeat classes.***

RPKM measure (reads per kilobase per 10 million reads) was calculated similar to the RNA-seq analyses [56] and an enrichment compared to the input material (control) was calculated.

| class                    | length (bp) | % of total genomic sequence | ChIP signal (RPKM) |              | Enrichment   |
|--------------------------|-------------|-----------------------------|--------------------|--------------|--------------|
|                          |             |                             | NIPBL              | ChIP control |              |
| <b>SINE-Alu</b>          | 306745172   | 9.91                        | 1.68               | 1.56         | <b>1.08</b>  |
| <b>SINE-MIR</b>          | 84349685    | 2.72                        | 4.75               | 4.97         | <b>0.96</b>  |
| <b>SINE-Other</b>        | 571757      | 0.02                        | 5.94               | 5.76         | <b>1.03</b>  |
| <b>LINE-L1</b>           | 512445461   | 16.55                       | 2.08               | 1.96         | <b>1.07</b>  |
| <b>LINE-L2</b>           | 103990071   | 3.36                        | 5.08               | 5.18         | <b>0.98</b>  |
| <b>LINE-CR1</b>          | 10860002    | 0.35                        | 4.55               | 4.48         | <b>1.02</b>  |
| <b>LINE-RTE</b>          | 3643770     | 0.12                        | 4.08               | 3.79         | <b>1.08</b>  |
| <b>LINE-Other</b>        | 201745      | 0.01                        | 4.89               | 4.75         | <b>1.03</b>  |
| <b>LTR-ERV1-MaLR</b>     | 110849894   | 3.58                        | 4                  | 3.88         | <b>1.03</b>  |
| <b>LTR-ERV1</b>          | 56136298    | 1.81                        | 4.86               | 4.81         | <b>1.01</b>  |
| <b>LTR-ERV1</b>          | 83494001    | 2.7                         | 3.2                | 3.06         | <b>1.04</b>  |
| <b>LTR-ERV1</b>          | 8842596     | 0.29                        | 1.94               | 1.72         | <b>1.13</b>  |
| <b>LTR-Gypsy</b>         | 2301837     | 0.07                        | 5.28               | 5.15         | <b>1.03</b>  |
| <b>LTR-ERV</b>           | 191609      | 0.01                        | 5.36               | 4.77         | <b>1.12</b>  |
| <b>DNA-TcMar-Tigger</b>  | 33986503    | 1.1                         | 3.15               | 3.03         | <b>1.04</b>  |
| <b>DNA-TcMar-Mariner</b> | 2830187     | 0.09                        | 3.29               | 3.11         | <b>1.06</b>  |
| <b>DNA-TcMar-Tc2</b>     | 1669939     | 0.05                        | 3.24               | 3.08         | <b>1.05</b>  |
| <b>DNA-TcMar</b>         | 318232      | 0.01                        | 3.82               | 3.53         | <b>1.08</b>  |
| <b>DNA-hAT-Charlie</b>   | 45014464    | 1.45                        | 4.17               | 4.03         | <b>1.04</b>  |
| <b>DNA-hAT-Blackjack</b> | 3419498     | 0.11                        | 4.31               | 4.22         | <b>1.02</b>  |
| <b>DNA-hAT-Tip100</b>    | 6614899     | 0.21                        | 4.35               | 4.32         | <b>1.01</b>  |
| <b>DNA-hAT</b>           | 1687099     | 0.05                        | 4.11               | 4.09         | <b>1.01</b>  |
| <b>DNA-Other</b>         | 2734962     | 0.09                        | 4.06               | 3.79         | <b>1.07</b>  |
| <b>Satellite-acro</b>    | 31038       | 0                           | 14.04              | 11.47        | <b>1.22</b>  |
| <b>Satellite-centr</b>   | 8243430     | 0.27                        | 10.45              | 9.17         | <b>1.14</b>  |
| <b>Satellite-telo</b>    | 254147      | 0.01                        | 3.2                | 4.27         | <b>0.75</b>  |
| <b>Satellite</b>         | 4025177     | 0.13                        | 18.3               | 17.69        | <b>1.03</b>  |
| <b>rRNA</b>              | 175474      | 0.01                        | 265.35             | 19.96        | <b>13.3</b>  |
| <b>LSU-rRNA_Hsa</b>      | 68641       | 0.002                       | 442.08             | 28.92        | <b>15.28</b> |
| <b>SSU-rRNA_Hsa</b>      | 16619       | 0.001                       | 947.81             | 66.34        | <b>14.29</b> |
| <b>5S</b>                | 90214       | 0.003                       | 5.15               | 4.59         | <b>1.12</b>  |
| <b>tRNA</b>              | 102988      | 0                           | 8.09               | 13.2         | <b>0.61</b>  |
| <b>scRNA</b>             | 122042      | 0                           | 3.5                | 3.5          | <b>1</b>     |
| <b>snRNA</b>             | 337551      | 0.01                        | 5.57               | 4.13         | <b>1.35</b>  |
| <b>srpRNA</b>            | 263136      | 0.01                        | 4.09               | 4.24         | <b>0.96</b>  |
| <b>RNA</b>               | 118748      | 0                           | 4.73               | 5.74         | <b>0.82</b>  |
| <b>Low_complexity</b>    | 16922589    | 0.55                        | 2.79               | 2.35         | <b>1.19</b>  |
| <b>Simple_repeat</b>     | 26087578    | 0.84                        | 2.78               | 3.15         | <b>0.88</b>  |
| <b>Other_repeat</b>      | 6109487     | 0.2                         | 1.85               | 1.83         | <b>1.01</b>  |
